# Supplementary material for: Calcium-binding Cab45 regulates the polarized apical secretion of soluble proteins in epithelial cells
Source: PubMed Central journal article supplement — Mol Biol Cell. 2023 Jul 1;34(8):br12. doi: 10.1091/mbc.E22-12-0549 (PMC10398874; doi:10.1091/mbc.e22-12-0549), 2023-07-01
Supplement: mbc-34-br12-s001.pdf [file mbc-34-br12-s001.pdf]

Supplementary Materials  
*Molecular Biology of the Cell*  
Liu *et al.*

**Figure S1: Cab45 does not regulate the basolateral secretion of Wnt3a**

(A) MDCK PLAP-sec cultured on coverslip were considered to reveal intracellular PLAP-sec localization and endoplasmic reticulum (ER) (KDEL sequence). Scale bar 10 $\mu$ m . (B, C, D) MDCK Wnt3a CTRLi or Cab45i plated on coverslip were proceed for immunofluorescence to reveal Cab45 (B) or Wnt3a and ER marker (C). **submission** AP and BL media of MDCK Wnt3a CTRLi or Cab45i plated on filters for 4 days were collected to monitor Wnt3a secretion. On the right quantification of AP and BL Wnt3a secretion normalized to intracellular tubulin levels. Experiments were performed 3 different times. (NS) not significant.

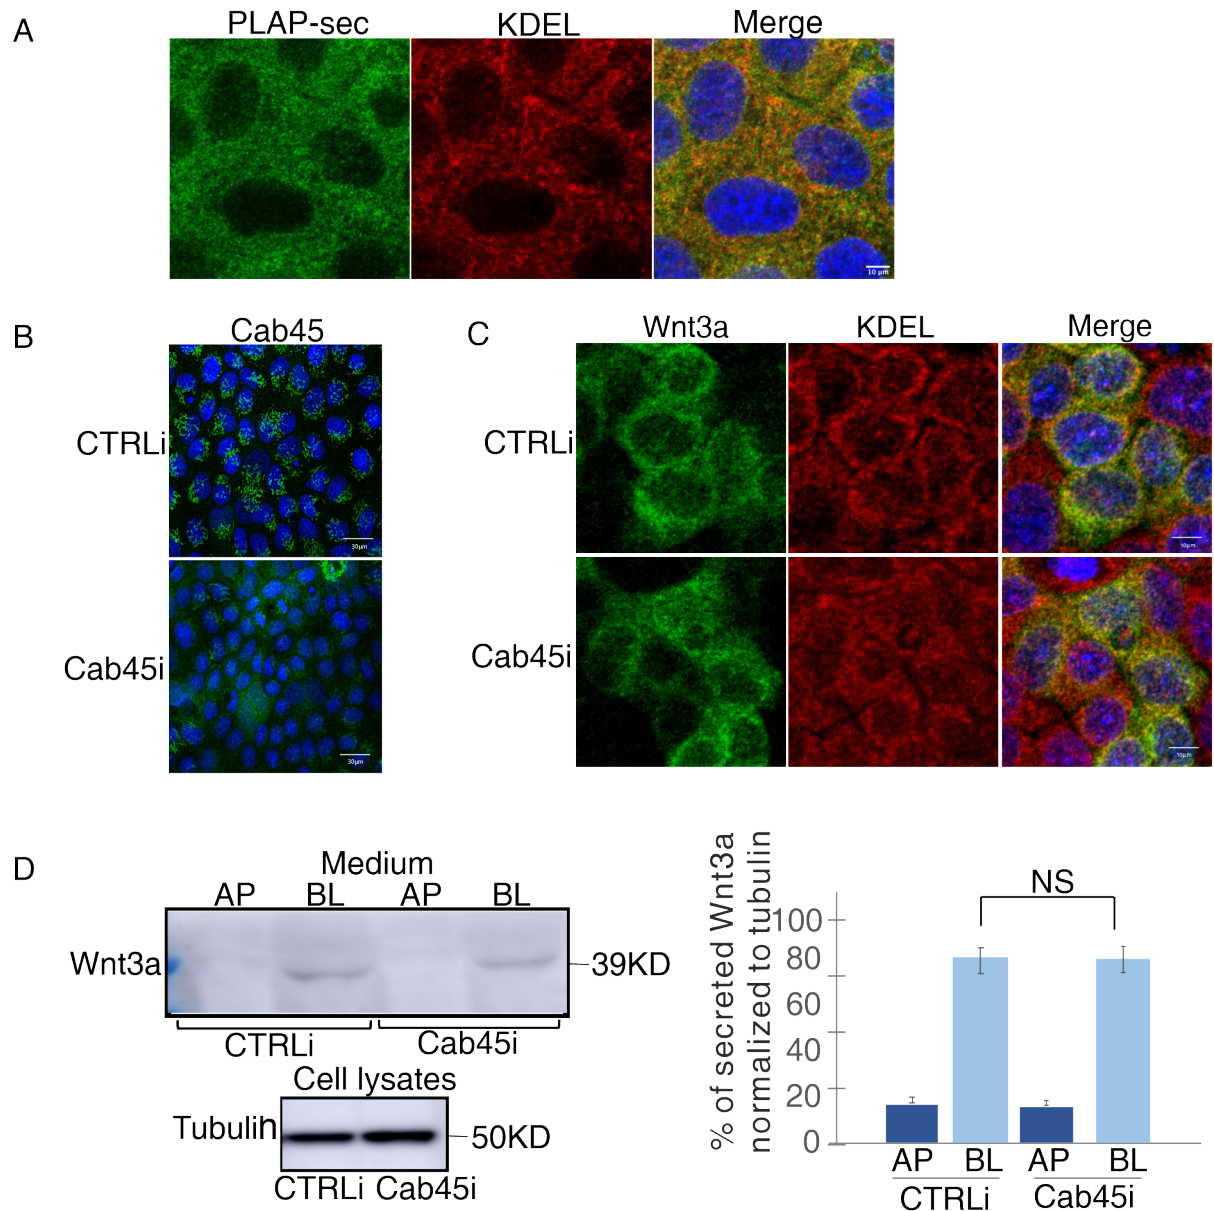

Figure S1
